**M. V. Lebour.** "The Eggs and Larvae of some British Turridae." Journ. Mar. Biol. Assoc. N. F., Vol. XIX, No. 2. Plymouth, 1934.

Larven aus dieser Familie sind bei Plymouth gemein und gehören zu den grössten Gastropodenlarven, sodass sie ökonomische Bedeutung haben. Es kommen 3 Arten von *Mangelia* und 6 von *Philbertia* vor. Die Unterscheidung der Larven gründet sich hauptsächlich auf der Oberflächenskulptur der Embryonalschalen. Eier und Larven der verschiedenen Arten werden teils auf Grund von Planktonmaterial, teils auf Grund von Aquarienzuchten beschrieben und abgebildet.

E. H.

**F. S. Russell.** "On the Occurrence of the Siphonophores *Muggiaea atlantica* Cunningham and *Muggiaea Kochi*, (Will) in the English Channel." Journ. Mar. Biol. Assoc. N. F., Vol. XIX, No. 2. Plymouth, 1934.

In den Jahren 1913 bis 1924 kam im Plankton bei Seven Stones nur die erstere Art, von 1925 bis 1934 dort und bei Plymouth nur die letztere vor. Ob *M. Kochi* auch anderwärts neuerdings vorherrschend ist, wird aus der Literatur nicht erkennbar.

E. H.

**A. C. Gardiner.** "Variations in the Amount of Macroplankton by Day and Night." Journ. Mar. Biol. Assoc. N. F., Vol. XIX, No. 2. Plymouth, 1934.

Die Untersuchung gründet sich auf 20 innerhalb eines Zeitraums von 48 Stunden ausgeführte schräge Netzzüge vom Boden bis zur Oberfläche, die mit einem Stramin-Ringtrawl von 5 Fuss Durchmesser in der Nähe von Liverpool in Neuschottland ausgeführt wurden. Die Euphausiden fehlten bei Tage so gut wie ganz. Auch bei *Sagitta* fielen 75 % der Individuen auf die Nachtfänge, bei *Calanus finmarchicus* und *C. hyperboreus* 61 %, während bei den Fischeiern solche Unterschiede fehlten. Die tageszeitlichen Unterschiede sind in allen 3 Fällen auf vertikale Wanderungen, nicht auf Ausweichen vor dem Netz zurückzuführen. Bei *Sagitta* verhielten sich dabei die verschiedenen Grössen nicht verschieden, bei *Calanus* gingen tags mehr Erwachsene als letzte Copepoditen (V) in die Tiefe.

E. H.

**W. E. Frost.** "The Occurrence and Development of *Euphausia krohnii* off the South-West Coast of Ireland." Proc. Roy. Irish Acad. Vol. XLII, Section B, No. 3. Dublin, 1934.

The normal habitat for the living and breeding of *Euphausia krohnii*, an important oceanic euphausian, is on the Atlantic Slope and to the westward. All the specimens examined came from over 100 fathoms and the species probably usually lives in even deeper waters. It always occurs in waters of high salinity and of a fairly high temperature.

Breeding apparently goes on for most of the year and a large number of larval forms has been obtained which enables the life history to be completed.

Although the larvae have been known for a long time there were many gaps in the series and Miss Frost has now succeeded in obtaining Metanauplius, 3 Furciliæ and 8 Cyrtopias which she carefully describes and figures, but she has seen no eggs which could be referred definitely to
